# Supplementary material for: Testing network autocorrelation without replicates
Source: PubMed Central journal article supplement (PMC9632870; doi:10.1371/journal.pone.0275532), 2022-11-03
Supplement: pone.0275532.s001.pdf [file pone.0275532.s001.pdf]

## S1 Appendix: Convergence of the null distribution

To study the convergence of the test statistic to the asymptotic chi-squared distribution, for each  $n$ , a test statistic distribution is obtained by generating 20,000 such sets of associated random variables and calculating the test statistic  $Q(K)$  for each set according to the network structure of the subgraph  $G_n^I$ . These test statistic distributions are then compared to the chi-squared distribution  $\chi_K^2$  using the Kolmogorov-Smirnov (KS) distance. The results are summarized in S1 Table, while S8 Fig plots the KS distance against  $n$  for each value of  $K$ .

The results show that the test statistic  $Q(K)$  appears to converge to  $\chi_K^2$  for all values of  $K$  considered, with the observed KS distances decreasing as we increase the number of vertices  $n$ . Interestingly, for a fixed number of vertices, we find that the KS distance tends to increase with  $K$ , the number of network lags. In other words, *ceteris paribus*, convergence to the asymptotic chi-squared distribution is faster when the test statistic includes fewer network lags. One explanation for this behavior is that the summands of  $Q(K)$  are only asymptotically independent; although they are uncorrelated, they are only asymptotically normal, and therefore only independent at the limit. Thus, for small values of  $n$  this dependence may be non-negligible and therefore the chi-squared construction, i.e., the sum of squares of independent standard normal random variables, may not hold. Thus, for small sample sizes, when implementing the proposed network Ljung-Box test, the number of network lags included should be kept small in order to avoid significant deviations from the asymptotic chi-squared distribution. Nevertheless, S8 Fig demonstrates clearly that the test statistic indeed converges to  $\chi_K^2$  for all network lags  $K$  considered.
