# Supplementary material for: Testing network autocorrelation without replicates
Source: PubMed Central journal article supplement (PMC9632870; doi:10.1371/journal.pone.0275532), 2022-11-03
Supplement: pone.0275532.s003.pdf [file pone.0275532.s003.pdf]

### S3 Appendix: Proofs

The following are proofs to the theoretical results presented in the main manuscript.

#### Proof of Proposition 3:

We can rewrite  $S_k^n$  as

$$S_k^n = \sum_{(i,j) \in U_k^n} X_i X_j = \sum_{i \in \Gamma_k^n} \sum_{j \in \Xi_{i,k}^n} X_i X_j.$$

Denote

$$Y_i^n := \sum_{j \in \Xi_{i,k}^n} X_i X_j, \quad Y_i := \sum_{j \in \Xi_{i,k}} X_i X_j.$$

Obviously, if  $i \notin \Gamma_k^n$ , then  $\Xi_{i,k}^n = \emptyset$  and so  $Y_i^n = 0$ . We desire to use Theorem 1 of [?] to establish the CLT. To achieve this, we need to verify the physical dependence measure for  $Y_i$ ,  $i \in \mathbb{Z}$ , over the whole domain. We can then calculate that

$$\begin{aligned} \delta_{i,p/2}(Y) &= \left\| \sum_{j \in \Xi_{i,k}} X_i X_j - \sum_{j \in \Xi_{i,k}} X_i^* X_j^* \right\|_{p/2} \\ &\leq \left\| \sum_{j \in \Xi_{i,k}} X_i X_j - \sum_{j \in \Xi_{i,k}} X_i X_j^* \right\|_{p/2} + \left\| \sum_{j \in \Xi_{i,k}} X_i X_j^* - \sum_{j \in \Xi_{i,k}} X_i^* X_j^* \right\|_{p/2} \\ &\leq \|X_i\|_p \sum_{j \in \Xi_{i,k}} \|X_j - X_j^*\|_p + \sum_{j \in \Xi_{i,k}} \|X_i - X_i^*\|_p \|X_j^*\|_p \\ &\leq \sum_{j \in \Xi_{i,k}} \|X_0\|_p (\delta_{j,p} + \delta_{i,p}). \end{aligned}$$

Hence,

$$\Delta_{p/2}^Y = \sum_{i \in \mathbb{Z}} \delta_{i,p/2}(Y) \leq \sum_{i \in \Gamma_k} \sum_{j \in \Xi_{i,k}} \|X_0\|_p (\delta_{j,p} + \delta_{i,p}) = \|X_0\|_p \sum_{(i,j) \in U_k} (\delta_{i,p} + \delta_{j,p}).$$

As a result, if condition (i) holds, then we have  $\Delta_2^Y < \infty$  and the CLT holds for  $\sum_{(i,j) \in U_k^n} X_i X_j / |U_k^n|$  by Theorem 1 of [?] as long as conditions (ii) and (iii) are also satisfied.

#### Proof of Theorem 5:

To ease notation, denote  $\mathbb{E}[X_i^2] = \sigma^2$ , and define

$$C(k, n) := \frac{n(n + \lambda - 1)}{|U_k^n|}, \quad x(k, n) := \sum_{(i,j) \in U_k^n} X_i^n X_j^n, \quad y(n) := \sum_{(i,i) \in U_0^n} (X_i^n)^2.$$

To complete the proof, it suffices to show that  $\sqrt{C(k, n)} r_{k,n}$  are asymptotically i.i.d. standard normal random variables.

We begin by evaluating the moments of  $y(n)$  and  $x(k, n)$ . By using the law of total expectation, it is immediately clear that  $\mathbb{E}[y(n)] = n\sigma^2$ . Moreover, we also have

$$\begin{aligned} \mathbb{E}[y(n)^2] &= \mathbb{E} \left[ \sum_{(i,i) \in U_0^n} (X_i^n)^4 + \sum_{(i,i) \in U_0^n} \sum_{j \neq i} (X_i^n)^2 (X_j^n)^2 \right] \\ &= n\lambda\sigma^4 + \sum_{(i,i) \in U_0^n} \sum_{j \neq i} \sigma^4 = n(n + \lambda - 1)\sigma^4 \end{aligned}$$

where the second equality follows from the definition of  $\lambda$ . As a result, the variance of  $y(n)$  is given by

$$\text{Var}(y(n)) = \mathbb{E}[y(n)^2] - \mathbb{E}[y(n)]^2 = n(\lambda - 1)\sigma^4.$$

Therefore, as  $n \rightarrow \infty$  we have  $\text{Var}\left(\frac{y(n)}{n}\right) \rightarrow 0$ , and hence

$$\frac{y(n)}{n} \xrightarrow{p} \mathbb{E}[X_i^2] = \sigma^2.$$

Next, we likewise evaluate the moments of  $x(k, n)$ . By the assumption of independence, and the fact the variables are centered, we have

$$\mathbb{E}[x(k, n)] = \sum_{(i,j) \in U_k^n} \mathbb{E}[X_i^n X_j^n] = \sum_{(i,j) \in U_k^n} \mathbb{E}[X_i^n] \mathbb{E}[X_j^n] = 0,$$

and similarly

$$\mathbb{E}[x(k, n)^2] = \sum_{(i,j) \in U_k^n} \sum_{(m,l) \in U_k^n} \mathbb{E}[X_i^n X_j^n X_m^n X_l^n] = \sum_{(i,j) \in U_k^n} \mathbb{E}[(X_i^n)^2 (X_j^n)^2] = |U_k^n| \sigma^4$$

where the second inequality follows from the fact that if  $(i, j) \neq (m, l)$ , then the independence and zero-mean assumptions imply  $\mathbb{E}[X_i^n X_j^n X_m^n X_l^n] = 0$ . As a result, it follows that as  $n \rightarrow \infty$  we have

$$\mathbb{E}\left[\left(\frac{x(k, n)}{n}\right)^2\right] \rightarrow 0.$$

On the other hand, for  $k \neq l$ , we have

$$\text{Cov}(x(k, n), x(l, n)) = \mathbb{E}\left[\sum_{(i,j) \in U_k^n} X_i^n X_j^n \sum_{(m,h) \in U_l^n} X_m^n X_h^n\right] = 0$$

since it is impossible for  $(i, j) = (m, h)$  if  $(i, j) \in U_k^n$  and  $(m, h) \in U_l^n$ , and hence we have  $\mathbb{E}[X_i^n X_j^n X_m^n X_h^n] = 0$  for all summands. An application of Slutsky's theorem then yields

$$\mathbb{E}[r_{k,n}] = \mathbb{E}\left[\frac{x(k, n)}{y(n)}\right] = \mathbb{E}\left[\frac{\frac{1}{n}x(k, n)}{\frac{1}{n}y(n)}\right] \rightarrow 0$$

and

$$\mathbb{E}[r_{k,n}r_{l,n}] = \mathbb{E}\left[\frac{\frac{1}{n}x(k, n)\frac{1}{n}x(l, n)}{\frac{1}{n^2}y(n)^2}\right] \rightarrow 0$$

as  $n \rightarrow \infty$ . Hence  $r_{k,n}$  and  $r_{l,n}$  are asymptotically uncorrelated for  $k \neq l$ . Further, if  $r_{k,n}$  and  $r_{l,n}$  are, after rescaling, asymptotically normal, then they will be asymptotically independent. We also have

$$\mathbb{E}[C(k, n)r_{k,n}^2] = \frac{n + \lambda - 1}{n} \mathbb{E}\left[\frac{x(k, n)^2/|U_k|}{(y(n)/n)^2}\right] \rightarrow 1,$$

as  $n \rightarrow \infty$ . All that remains is to establish that  $\sqrt{C(k, n)}r_{k,n}$  are indeed asymptotically normal using an applicable version of the CLT. Specifically, we need to show

$$\sqrt{\frac{n(n + \lambda - 1)}{|U_k|} \frac{\sum_{(i,j) \in U_k} X_i^n X_j^n}{\sum_{(i,i) \in U_0^n} (X_i^n)^2}}$$

are asymptotically normal for  $k = 1, 2, \dots, K$ . Note that we have

$$\frac{\sqrt{n(n+\lambda-1)}}{\sum_{(i,i) \in U_0^n} (X_i^n)^2} = \frac{n}{\sum_{(i,i) \in U_0^n} (X_i^n)^2} \sqrt{\frac{n(n+\lambda-1)}{n}} \xrightarrow{p} \frac{1}{\sigma^2}$$

and so we need only verify that

$$\frac{\sum_{(i,j) \in U_k^n} X_i^n X_j^n}{\sqrt{|U_k^n|}} \xrightarrow{d} N(0, \sigma^4). \quad (1)$$

To do this, we will apply Proposition 1, taking  $g(\cdot)$  as the identity function, i.e.,  $X_i = g(\epsilon_i) = \epsilon_i$ . This can be done since the random variables  $X_1, X_2, \dots, X_n$  are assumed to be i.i.d. Then clearly we have

$$\hat{\Delta}_k = \sum_{(i,j) \in U_k} (\delta_{i,4} + \delta_{j,4}) < \infty$$

using similar arguments as that after Corollary 1. Additionally, we have

$$\sigma_n^2 = \mathbb{E} \left[ \left( \sum_{(i,j) \in U_k^n} X_i^n X_j^n \right)^2 \right] = \sum_{(i,j) \in U_k^n} \mathbb{E}[(X_i^n)^2 (X_j^n)^2] = |U_k^n| \sigma^4 \rightarrow \infty \quad \text{as } n \rightarrow \infty.$$

It then immediately follows from Proposition 1 that

$$\frac{\sum_{(i,j) \in U_k^n} X_i^n X_j^n}{\sqrt{|U_k^n|}} \xrightarrow{d} N(0, \sigma^4),$$

completing the proof.
