# Supplementary material for: Testing network autocorrelation without replicates
Source: PubMed Central journal article supplement (PMC9632870; doi:10.1371/journal.pone.0275532), 2022-11-03
Supplement: pone.0275532.s016.pdf [file pone.0275532.s016.pdf]

## S1 Table

| Kolmogorov-Smirnov Distances |         |         |         |         |         |         |
|------------------------------|---------|---------|---------|---------|---------|---------|
|                              | $K = 1$ | $K = 2$ | $K = 3$ | $K = 4$ | $K = 5$ | $K = 6$ |
| $n = 50$                     | 0.0145  | 0.0344  | 0.0542  | 0.0708  | 0.0883  | 0.1076  |
| $n = 100$                    | 0.0057  | 0.0340  | 0.0610  | 0.0800  | 0.0960  | 0.1056  |
| $n = 150$                    | 0.0042  | 0.0204  | 0.0408  | 0.0604  | 0.0737  | 0.0835  |
| $n = 200$                    | 0.0045  | 0.0165  | 0.0342  | 0.0498  | 0.0585  | 0.0736  |
| $n = 250$                    | 0.0052  | 0.0174  | 0.0294  | 0.0442  | 0.0493  | 0.0613  |
| $n = 300$                    | 0.0064  | 0.0107  | 0.0205  | 0.0273  | 0.0419  | 0.0541  |
| $n = 350$                    | 0.0058  | 0.0084  | 0.0228  | 0.0334  | 0.0458  | 0.0545  |
| $n = 400$                    | 0.0063  | 0.0125  | 0.0182  | 0.0310  | 0.0417  | 0.0524  |
| $n = 450$                    | 0.0064  | 0.0138  | 0.0194  | 0.0280  | 0.0365  | 0.0449  |
| $n = 500$                    | 0.0044  | 0.0155  | 0.0180  | 0.0284  | 0.0376  | 0.0431  |
| $n = 1000$                   | 0.0075  | 0.0059  | 0.0077  | 0.0151  | 0.0165  | 0.0210  |

**S1 Table. Kolmogorov-Smirnov distances for simulated test statistic distributions** KS distances between simulated  $Q(K)$  and  $\chi_K^2$  distributions for different values of  $n$  and  $K$  using the immuno dataset.
