# Supplementary material for: Testing network autocorrelation without replicates
Source: PubMed Central journal article supplement (PMC9632870; doi:10.1371/journal.pone.0275532), 2022-11-03
Supplement: pone.0275532.s017.pdf [file pone.0275532.s017.pdf]

## S2 Table

| Fitted Spatial-Temporal Autoregressive Models |                |                 |                 |                |                |          |
|-----------------------------------------------|----------------|-----------------|-----------------|----------------|----------------|----------|
|                                               | $\hat{\alpha}$ | $\hat{\beta}_1$ | $\hat{\beta}_2$ | $\hat{\gamma}$ | $\hat{\sigma}$ | AIC      |
| AR(1,1)                                       | 0.036          | 0.681           | –               | 0.246          | 0.157          | -311.251 |
| AR(2,1)                                       | 0.018          | 0.455           | 0.309           | 0.208          | 0.154          | -337.443 |

**S2 Table. Fitted spatial-temporal autoregressive models.** Fitted spatial-temporal AR( $p,1$ ) models to logarithms of confirmed COVID-19 cases in New York counties.
