# Supplementary material for: Testing network autocorrelation without replicates
Source: PubMed Central journal article supplement (PMC9632870; doi:10.1371/journal.pone.0275532), 2022-11-03
Supplement: pone.0275532.s018.pdf [file pone.0275532.s018.pdf]

### S3 Table

| Spatial lags | AR(1,1) |             | AR(2,1) |             |
|--------------|---------|-------------|---------|-------------|
|              | $Q(K)$  | $p$ -value  | $Q(K)$  | $p$ -value  |
| $K = 1$      | 329.873 | $p < 0.001$ | 265.814 | $p < 0.001$ |
| $K = 2$      | 547.247 | $p < 0.001$ | 417.563 | $p < 0.001$ |
| $K = 3$      | 596.428 | $p < 0.001$ | 440.301 | $p < 0.001$ |
| $K = 4$      | 599.586 | $p < 0.001$ | 440.482 | $p < 0.001$ |
| $K = 5$      | 604.305 | $p < 0.001$ | 450.905 | $p < 0.001$ |
| $K = 6$      | 608.769 | $p < 0.001$ | 461.925 | $p < 0.001$ |

**S3 Table. Obtained  $p$ -values for spatial-temporal independence.** Obtained  $p$ -values for error terms of the spatial-temporal AR( $p$ ,1) model ( $n = 434$ ).
